# Supplementary material for: A microfluidic culture platform for CNS axonal injury, regeneration and transport
Source: Springer Nature journal article supplement (doi:10.1038/nmeth777), 2005-07-21
Supplement: 41592_2005_BFnmeth777_MOESM1_ESM.pdf [file 41592_2005_BFnmeth777_MOESM1_ESM.pdf]

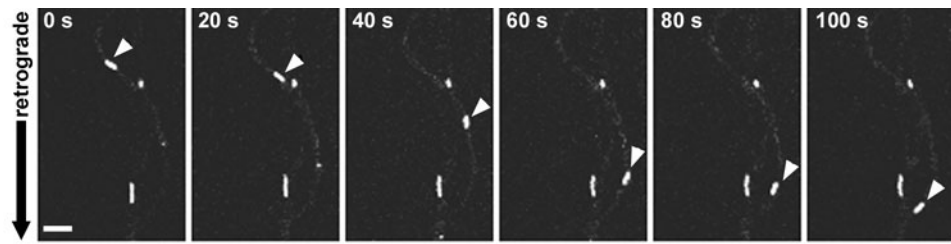

**Supplementary Figure 1** The microfluidic platform facilitates live imaging of axonal transport. The transport direction of mitochondria (mitotracker green) is known since the chambers establish axonal polarity. The white arrowhead points to a mitochondria moving towards the cell bodies (i.e., retrograde). Scale bar = 2  $\mu$ m.
