# Supplementary material for: A microfluidic culture platform for CNS axonal injury, regeneration and transport
Source: Springer Nature journal article supplement (doi:10.1038/nmeth777), 2005-07-21
Supplement: 41592_2005_BFnmeth777_MOESM2_ESM.pdf [file 41592_2005_BFnmeth777_MOESM2_ESM.pdf]

## Supplementary Methods

Using photolithography, we patterned the master with two layers of the negative photoresist, SU-8 (Microchem), containing the microgrooves and compartments. A UV aligner exposed a layer of SU-8 5 (3  $\mu\text{m}$  thick) through a 20,000 dpi high-resolution transparency mask (CAD/Art Services), containing the pattern of microgrooves (10  $\mu\text{m}$  wide, spaced 60  $\mu\text{m}$  apart). After developing, we exposed a second layer of SU-8 50 (100  $\mu\text{m}$  thick) through a mask containing the pattern of compartments. After developing, we placed the wafer in a clean Petri dish and treated it with (tridecafluoro-1,1,2,2-tetrahydrooctyl)trichlorosilane for 20 min to facilitate release of the solid PDMS from the master. Several review papers describe the details of fabrication of PDMS-based microfluidic devices.<sup>1-3</sup>

1. McDonald, J. C. et al. Fabrication of microfluidic systems in poly(dimethylsiloxane). *Electrophoresis* **21**, 27-40 (2000).
2. Whitesides, G. M., Ostuni, E., Takayama, S., Jiang, X. & Ingber, D. E. Soft lithography in biology and biochemistry. *Annu Rev Biomed Eng* **3**, 335-73 (2001).
3. Sia, S. K. & Whitesides, G. M. Microfluidic devices fabricated in poly(dimethylsiloxane) for biological studies. *Electrophoresis* **24**, 3563-76 (2003).
